# Supplementary material
Source: PubMed Central journal article supplement (PMC5063706)
Supplement: NIHMS812133-supplement-Online_supplemental_material.pdf [file NIHMS812133-supplement-Online_supplemental_material.pdf]

## **Muscarinic Stimulation Facilitates SR Ca Release by Modulating RyR2 Phosphorylation Through PKG and CaMKII**

Hsiang-Ting Ho<sup>a,b,c</sup>, Andriy E Belevych<sup>a,b</sup>, Bin Liu<sup>a,b</sup>, Ingrid M. Bonilla<sup>b,d</sup>, Przemysław B. Radwański<sup>a,b,d</sup>, Igor V Kubasov<sup>e</sup>, Héctor H Valdivia<sup>f</sup>, Karsten Schober<sup>g</sup>, Cynthia A Carnes<sup>b,d</sup> and Sándor Györke<sup>a,b</sup>

### **Affiliations**

<sup>a</sup>Department of Physiology and Cell Biology, The Ohio State University, 1645 Neil Avenue, Columbus, OH43210, USA

<sup>b</sup>Davis Heart and Lung Research Institute, 473 W 12th Ave, Columbus, OH43210, USA

<sup>c</sup>Department of Medicine - Cardiology, Duke University Medical Center, 203 Research Drive, Durham, NC 27710, USA

<sup>d</sup>College of Pharmacy, The Ohio State University, 500 W 12th Ave, Columbus, OH43210, USA

<sup>e</sup>I.M. Sechenov Institute of Evolutionary Physiology and Biochemistry, pr. Toreza, 44, St Petersburg, Russia, 194223

<sup>f</sup>Center for Arrhythmia Research, Cardiovascular Division of the Department of Internal Medicine, University of Michigan, 1500 E. Medical Center Drive, Ann Arbor, MI 48109, USA

<sup>g</sup>College of Veterinary Medicine, 1900 Coffey Rd, The Ohio State University, Columbus, OH 43210, USA

### **Corresponding author**

Sándor Györke: Davis Heart and Lung Research Institute, The Ohio State University Medical Center, 473W. 12th Avenue, Columbus, OH 43210, USA. Email: [sandor.gyorke@osumc.edu](mailto:sandor.gyorke@osumc.edu). Tel: (614) 292-3969, Fax: (614) 247-7799

## Online Supplement

### Methods

#### Mouse Model

Wild-type (WT) and RyR2 knock-in (RyR2-S2808A)<sup>1</sup> 3-6 month old male mice were used in this study. Ventricular cells were isolated using Liberase TH Research Grade enzyme (Roche) as previously described.<sup>2,3</sup> For Ca imaging, cells were loaded with the Ca-sensitive indicators Fluo-4 FF AM (10  $\mu\text{mol/L}$ ) for 25 minutes followed by an additional 25 minutes for de-esterification. Loaded cells were excited with the 488 nm line of an argon laser and emission was collected at 500-600 nm. The fluorescence was recorded in the line scan mode of an Olympus Fluoview 1000 confocal microscope. The external, Tyrode solution contained (mmol/L): 140 NaCl, 5.4 KCl, 1 or 2.5  $\text{CaCl}_2$ , 0.5  $\text{MgCl}_2$ , 10 Hepes and 5.6 glucose (pH 7.3). Myocytes were paced at 0.5 Hz using extracellular platinum electrodes. Experiments were performed within 4 hours after myocyte isolation.

#### Canine Model

Out-bred hound type dogs were obtained consistent with NIH guidance. Young adult dogs (1-3 years, 15-30 kg) of either sex were used, and either had heart failure induced or served as controls. Heart failure was induced by a minimum of 16 weeks of right ventricular tachypacing.<sup>4-6</sup> Serial echocardiograms were used to assess left ventricular function and cardiac chamber dimensions. This 16-week heart failure model emulates all aspects of human heart failure including atrial and ventricular dilatation, impaired systolic function, myocyte hypertrophy, elevated catecholamines, and decreased functional capacity assessed by six-minute walk test.

Ventricular myocytes were prepared following established procedures.<sup>4-6</sup> To monitor intracellular Ca and reactive oxygen species (ROS), Ca- and ROS-sensitive indicators Rhod-4 AM (10  $\mu\text{mol/L}$ ) and CM-H<sub>2</sub>DCFDA AM (10  $\mu\text{mol/L}$ ) were used, respectively. Similar to mouse myocytes, cells were loaded with the dyes for 25 minutes followed by an additional 25 minutes for de-esterification. Rhod-4 was excited by 543 nm laser and emission was collected at 590-690 nm whereas CM-H<sub>2</sub>DCFDA was excited by 488 nm line of an argon laser and signal was collected at 500–560 nm. Myocytes were paced at 0.3, 0.5, 1 or 2 Hz using extracellular platinum electrodes in normal 2 mmol/L Ca Tyrode solution. Experiments were performed within 7 hours after myocyte isolation.

#### Biochemistry Assays

Cardiac cells were isolated, frozen in liquid nitrogen and kept in -80 °C until use. Protein concentrations were determined by Bradford assay. Cardiac homogenates (30-50  $\mu\text{g}$ ) were subjected to 4% to 15% SDS-PAGE, and blotted onto nitrocellulose membranes. Phosphorylation status of proteins was detected using phospho-specific antibodies: RyR2 Ser-2808 (Badrilla, A010-30P), Ser-2814 (Badrilla, A010-31P) and Ser-2030 (antibody was a generous gift from Dr. Héctor Valdivia) were normalized to total RyR2 (Thermo Scientific, MA3-916); GAPDH (Fitzgerald, 10R-G109A) was used as loading control. The blots were developed with Super Signal West Pico (PIERCE) and quantified using ImageJ software.

## Reference

1. Benkusky NA, Weber CS, Scherman JA, Farrell EF, Hacker TA, John MC, Powers PA, Valdivia HH. Intact beta-adrenergic response and unmodified progression toward heart failure in mice with genetic ablation of a major protein kinase A phosphorylation site in the cardiac ryanodine receptor. *Circ Res.* 2007;101:819-829.
2. Ho H-T, Liu B, Snyder JS, Lou Q, Brundage EA, Velez-Cortes F, Wang H, Ziolo MT, Anderson ME, Sen CK, Wehrens XHT, Fedorov VV, Biesiadecki BJ, Hund TJ, Györke S. Ryanodine receptor phosphorylation by oxidized CaMKII contributes to the cardiotoxic effects of cardiac glycosides. *Cardiovasc Res.* 2014;101:165-174.
3. Liu B, Ho H-T, Velez-Cortes F, Lou Q, Valdivia C, Knollmann B, Valdivia H, Györke S. Genetic ablation of ryanodine receptor 2 phosphorylation at Ser-2808 aggravates Ca<sup>2+</sup>-dependent cardiomyopathy by exacerbating diastolic Ca<sup>2+</sup> release. *J Physiol.* 2014;592:1957-1973.
4. Terentyev D, Györke I, Belevych AE, Terentyeva R, Sridhar A, Nishijima Y, Blanco EC de, Khanna S, Sen CK, Cardounel AJ, Carnes CA, Györke S. Redox Modification of Ryanodine Receptors Contributes to Sarcoplasmic Reticulum Ca<sup>2+</sup> Leak in Chronic Heart Failure. *Circ Res.* 2008;103:1466-1472.
5. Belevych AE, Terentyev D, Terentyeva R, Nishijima Y, Sridhar A, Hamlin RL, Carnes CA, Györke S. The relationship between arrhythmogenesis and impaired contractility in heart failure: role of altered ryanodine receptor function. *Cardiovasc Res.* 2011;90:493-502.
6. Belevych AE, Sansom SE, Terentyeva R, Ho H-T, Nishijima Y, Martin MM, Jindal HK, Rochira JA, Kunitomo Y, Abdellatif M, Carnes CA, Elton TS, Györke S, Terentyev D. MicroRNA-1 and -133 Increase Arrhythmogenesis in Heart Failure by Dissociating Phosphatase Activity from RyR2 Complex. *PLoS ONE.* 2011;6:e28324.

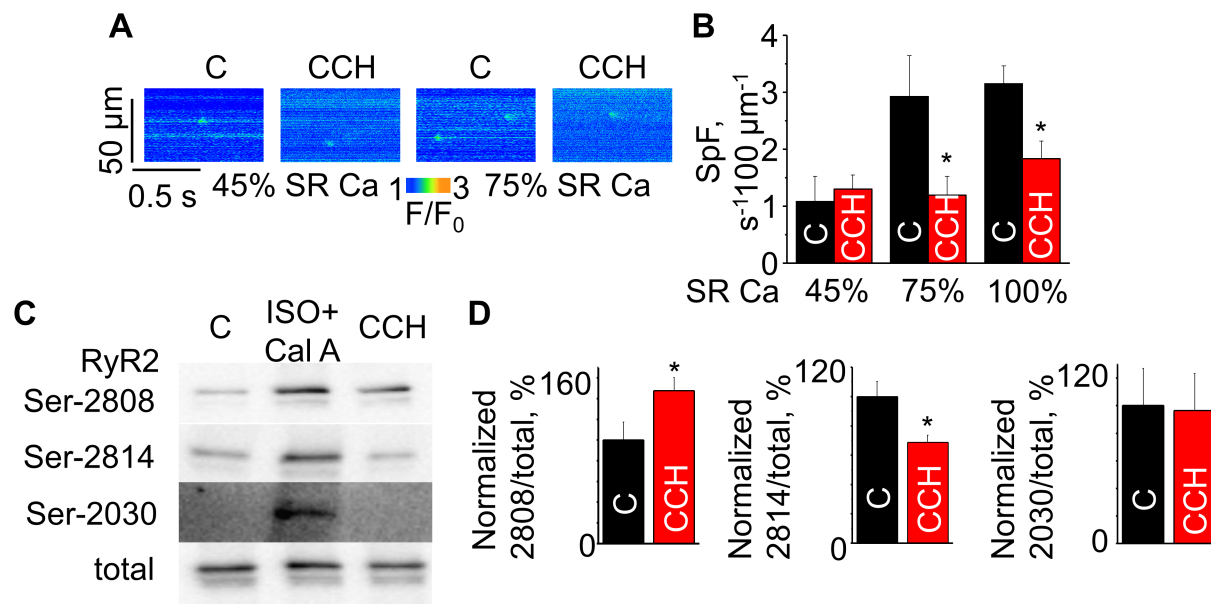

**Fig. S1 Effects of CCH on Ca handling and RyR2 phosphorylation in non-failing canine ventricular myocytes. (A)** Confocal images of Ca sparks recorded at various levels of the SR Ca content with or without 10  $\mu\text{mol/L}$  CCH. **(B)** Pooled data for the frequency of Ca sparks (SpF) observed at various levels of the SR Ca contents ( $\pm\text{SEM}$ ,  $n=6-10$ ). \* $P<0.05$  vs control (C). Immunoblots **(C)** and summary data **(D)** for the effect of CCH on phosphorylation of RyR2 ( $\pm\text{SEM}$ ,  $n=3$ ). \* $P<0.05$ , paired t-test. Cal A (Calyculin A) + ISO produces maximum phosphorylation. SR Ca content was obtained by application of 20  $\text{mmol/L}$  caffeine.

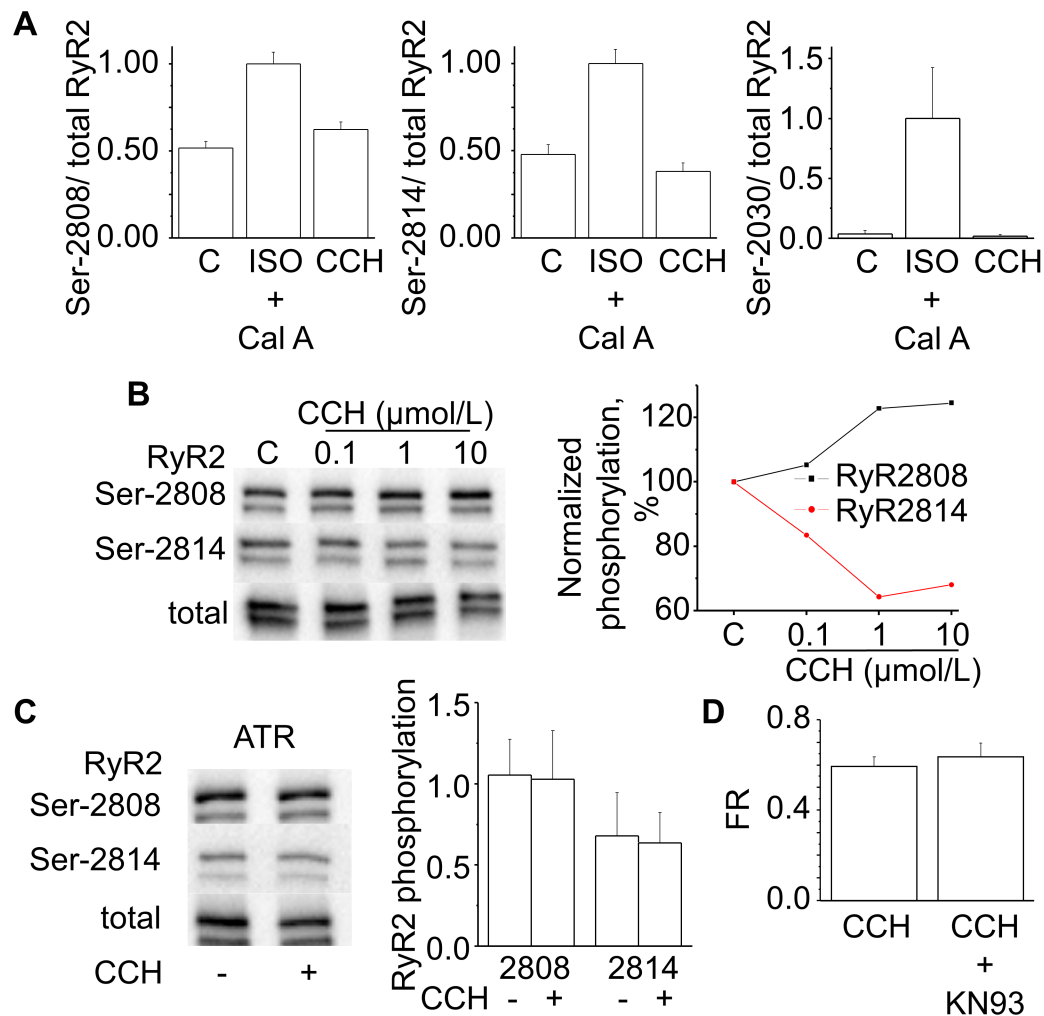

**Fig. S2 CCH causes reciprocal RyR2 phosphorylation on Ser-2808 and dephosphorylation on Ser-2814.** (A) Ser-2808 baseline phosphorylation compared to ISO+Cal A as maximum phosphorylation. ( $\pm$ SEM,  $n=4-18$ ). (B) Immunoblot and densitometric analysis of CCH dose response obtained in mouse ventricular myocytes. (C) Representative immunoblots (left) and pooled data (right) obtained in mouse ventricular myocytes in the presence of the muscarinic receptor antagonist, atropine (ATR) with or without CCH ( $\pm$ SEM,  $n=4$ ). (D) Effects of CaMKII inhibition by KN-93 on fractional release (FR) in the presence of CCH ( $\pm$ SEM,  $n=14$ ).

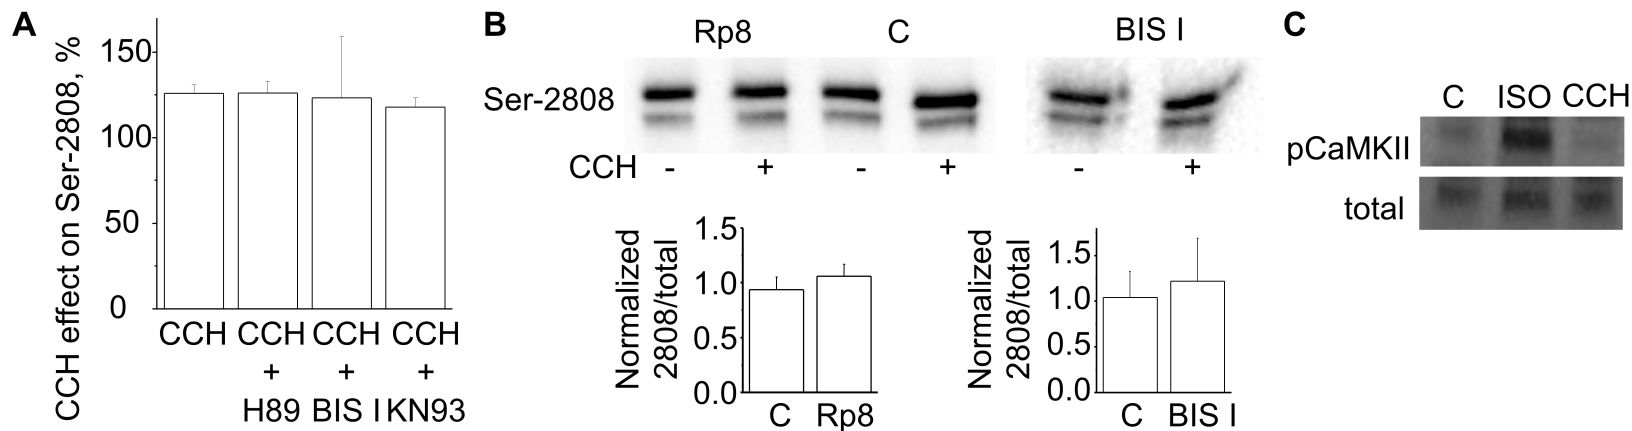

**Fig. S3 Ser-2808 baseline phosphorylation and kinases inhibitions.** **(A)** Effects of kinase inhibitions by H89 (PKA), BIS I (PKC) and KN-93 (CaMKII) on Ser-2808 in the presence of CCH ( $\pm$ SEM, n=2-7). **(B)** Representative immunoblots and pooled data obtained in mouse ventricular myocytes for Ser-2808 baseline in the presence of PKG inhibitor (Rp8) and PKC inhibitor (BIS I) ( $\pm$ SEM, n=3-8). **(C)** Immunoblot for CaMKII activity.
